# Supplementary material for: Impacts of an unknown daytime HONO source on the mixing ratio and budget of HONO, and hydroxyl, hydroperoxyl, and organic peroxy radicals, in the coastal regions of China
Source: Copernicus journal article supplement (doi:10.5194/acp-15-9381-2015), 2015-08-21
Supplement: Supplementary file 1 [file acp-15-9381-2015-supplement.pdf]

Supplement of Atmos. Chem. Phys., 15, 9381–9398, 2015  
<http://www.atmos-chem-phys.net/15/9381/2015/>  
doi:10.5194/acp-15-9381-2015-supplement  
© Author(s) 2015. CC Attribution 3.0 License.

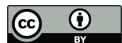

*Supplement of*

## **Impacts of an unknown daytime HONO source on the mixing ratio and budget of HONO, and hydroxyl, hydroperoxyl, and organic peroxy radicals, in the coastal regions of China**

**Y. Tang et al.**

*Correspondence to:* J. An (anj1@mail.iap.ac.cn)

The copyright of individual parts of the supplement might differ from the CC-BY 3.0 licence.

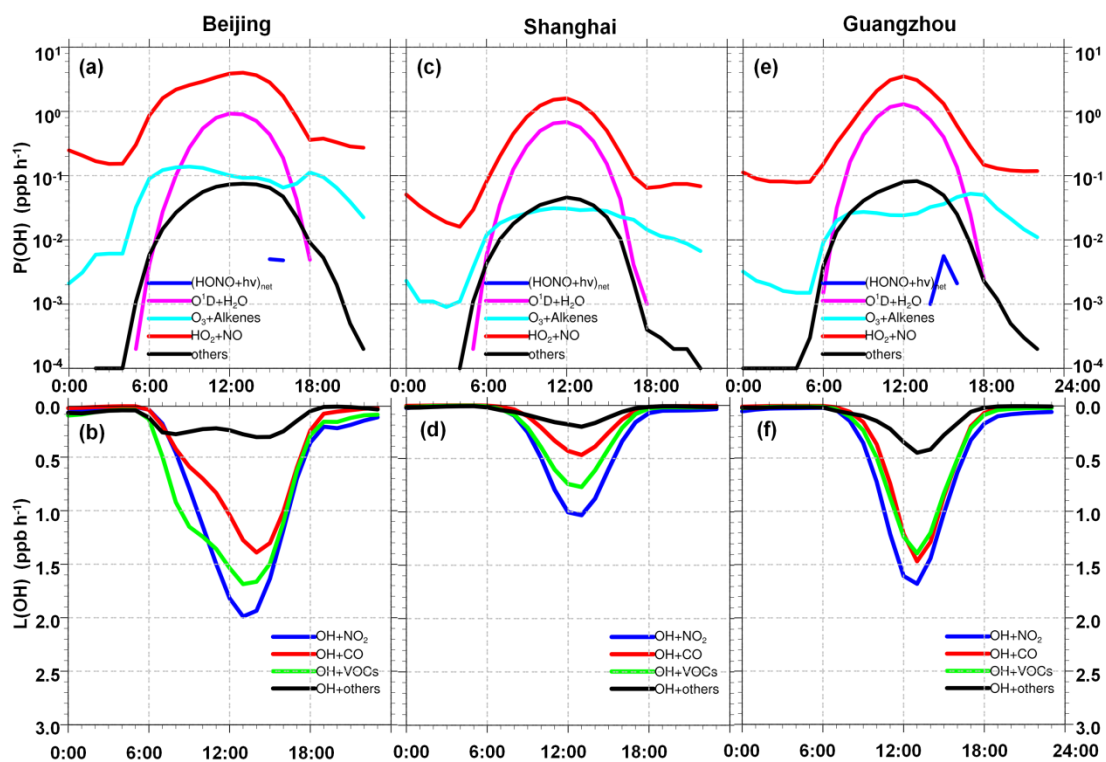

Fig. S1. Averaged production  $[P(\text{OH})]$  and loss  $[L(\text{OH})]$  rates of OH for case R in (a, b) Beijing, (c, d) Shanghai, and (e, f) Guangzhou in August 2007.  $(\text{HONO}+\text{h}\nu)_{\text{net}}$  means the net OH production rate from HONO photolysis (subtracting  $\text{OH} + \text{NO} = \text{HONO}$ ).

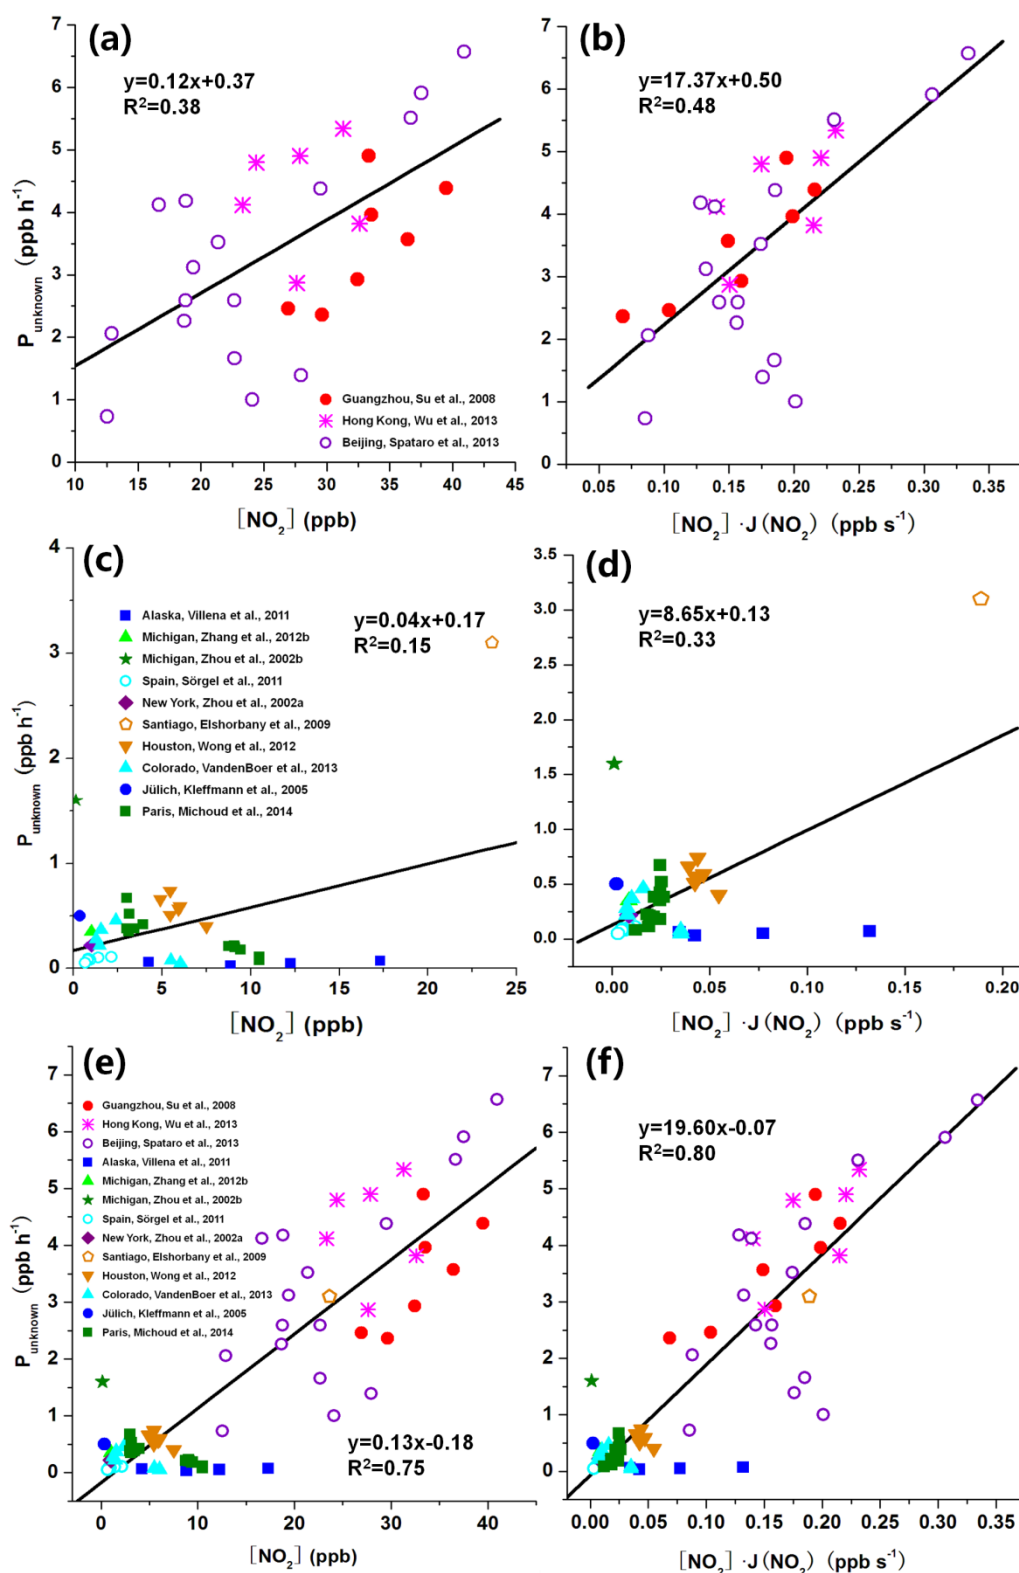

Fig. S1. Correlations of the unknown daytime HONO source ( $P_{\text{unknown}}$ ) (ppb h<sup>-1</sup>) with  $\text{NO}_2$  mixing ratios (ppb) and  $[\text{NO}_2] \cdot J(\text{NO}_2)$  (ppb s<sup>-1</sup>) in (a), (b) the coastal regions of China, (c), (d) the other countries, and (e), (f) the globe, respectively, based on the field experiment data shown in Fig. 1 in the revised version.

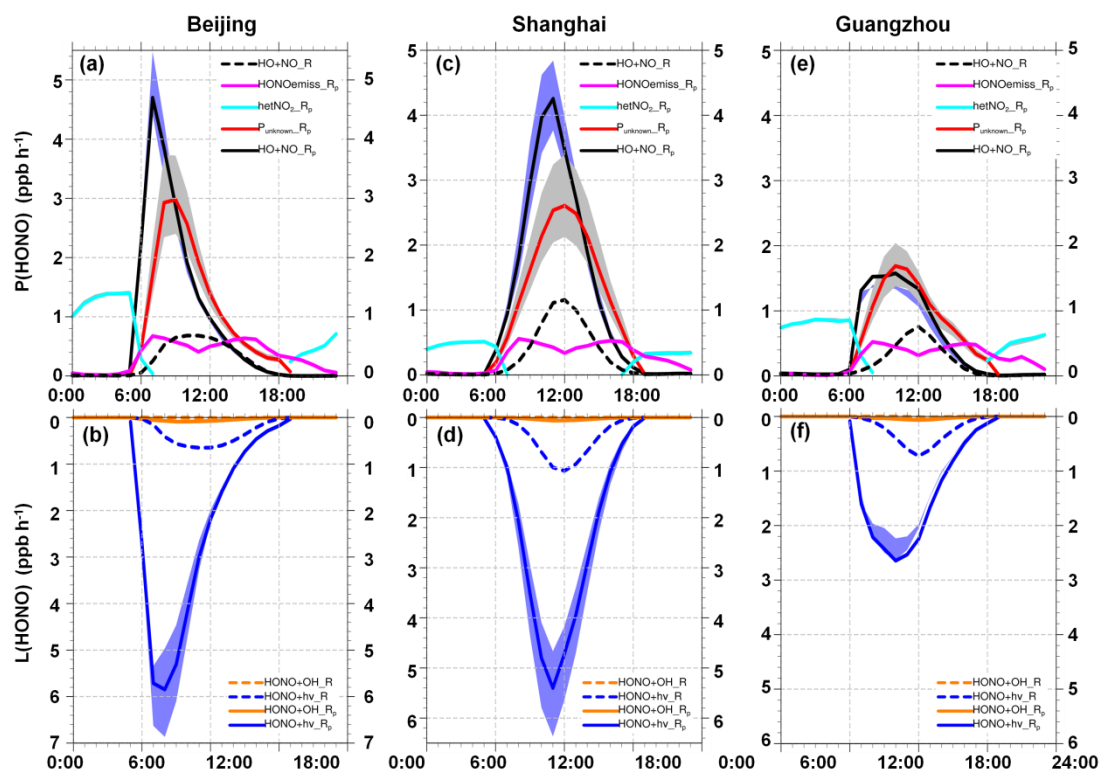

Fig. S3. Production [P(HONO)] and loss [L(HONO)] rates of HONO for cases R (dashed lines),  $R_p$  (solid lines) and sensitivity ranges (based on  $R_{inc}$  and  $R_{dec}$ ) in (a), (b) Beijing, (c), (d) Shanghai, and (e), (f) Guangzhou in August 2007. Case  $R_{inc}$  includes case  $R_p$  with an increase of 25% (the maximum uncertainty range according to the previous studies above) in the slope factor (19.60); Case  $R_{dec}$  is the same as case  $R_p$  with a decrease of 25% in the slope factor (19.60).

1 Table S1. The calculated unknown daytime HONO source ( $P_{\text{unknown}}$ ),  $\text{NO}_2$  mixing ratios and photolysis frequency of  $\text{NO}_2$  [ $J(\text{NO}_2)$ ] from field experiments in Figure  
 2 1.

| Site                              | Date                      | Time  | $P_{\text{unknown}}$<br>(ppb $\text{h}^{-1}$ ) | $[\text{NO}_2]$<br>(ppb) | $J(\text{NO}_2)$<br>( $\times 10^{-3} \text{ s}^{-1}$ ) | Measurement techniques /Uncertainties               | Reference                            |
|-----------------------------------|---------------------------|-------|------------------------------------------------|--------------------------|---------------------------------------------------------|-----------------------------------------------------|--------------------------------------|
| Xinken<br>(22.6 N,<br>113.6 E)    | 2004.10.23-<br>2004.10.30 | 09:30 | 2.36                                           | 29.65                    | 2.31                                                    | HONO: WD/IC;                                        | Su et al. (2008)<br>Su et al. (2011) |
|                                   |                           | 10:30 | 3.57                                           | 36.46                    | 4.09                                                    | $\text{NO}_2$ : estimated from NO and $\text{NO}_y$ |                                      |
|                                   |                           | 11:30 | 4.39                                           | 39.51                    | 5.46                                                    | (measured by the $\text{NO-O}_3$                    |                                      |
|                                   |                           | 12:30 | 4.90                                           | 33.33                    | 5.83                                                    | chemiluminescence detector (Kondo et                |                                      |
|                                   |                           | 13:30 | 3.96                                           | 33.54                    | 5.93                                                    | al., 1997))/22%;                                    |                                      |
|                                   |                           | 14:30 | 2.93                                           | 32.43                    | 4.92                                                    | $J(\text{NO}_2)$ : TUV/18%;                         |                                      |
|                                   |                           | 15:30 | 2.46                                           | 26.94                    | 3.85                                                    | $P_{\text{unknown}}$ : 10~30%.                      |                                      |
| Beijing<br>(39.99 N,<br>116.30 E) | 2007.08.17                | 8:00  | 2.59                                           | 22.66                    | 6.29                                                    |                                                     | Spataro et al. (2013)                |
|                                   |                           | 10:00 | 1.66                                           | 22.67                    | 8.16                                                    |                                                     |                                      |
|                                   |                           | 12:00 | 1.00                                           | 24.09                    | 8.35                                                    |                                                     |                                      |
|                                   |                           | 14:00 | 3.12                                           | 19.39                    | 6.82                                                    |                                                     |                                      |
|                                   | 2007.08.18                | 8:00  | 1.39                                           | 27.96                    | 6.29                                                    | HONO: Annular denuders;                             |                                      |
|                                   |                           | 10:00 | 3.52                                           | 21.37                    | 8.16                                                    | $\text{NO}_2$ : means of commercial ECOTECH         |                                      |
|                                   |                           | 12:00 | 4.12                                           | 16.66                    | 8.35                                                    | Ltd. (Australia analyzer)/ 1%;                      |                                      |
|                                   |                           | 14:00 | 2.06                                           | 12.90                    | 6.82                                                    | $J(\text{NO}_2)$ : calculated by $J(\text{HONO})$ ; |                                      |
|                                   | 2007.08.19                | 8:00  | 4.38                                           | 29.50                    | 6.29                                                    |                                                     |                                      |
|                                   |                           | 10:00 | 5.91                                           | 37.53                    | 8.16                                                    |                                                     |                                      |
|                                   |                           | 12:00 | 2.26                                           | 18.67                    | 8.35                                                    |                                                     |                                      |
|                                   |                           | 14:00 | 0.73                                           | 12.54                    | 6.82                                                    |                                                     |                                      |
| 2007.08.20                        | 8:00                      | 5.51  | 36.69                                          | 6.29                     |                                                         |                                                     |                                      |
|                                   | 10:00                     | 6.57  | 40.94                                          | 8.16                     |                                                         |                                                     |                                      |

|                                       |                           |      |       |      |       |                                                                                                                                                                                                                 |                                                         |                       |
|---------------------------------------|---------------------------|------|-------|------|-------|-----------------------------------------------------------------------------------------------------------------------------------------------------------------------------------------------------------------|---------------------------------------------------------|-----------------------|
|                                       |                           |      | 12:00 | 2.59 | 18.78 | 8.35                                                                                                                                                                                                            |                                                         |                       |
|                                       |                           |      | 14:00 | 4.18 | 18.79 | 6.82                                                                                                                                                                                                            |                                                         |                       |
| Tung Chung<br>(22.30 N,<br>113.93 E ) | 2011.08.25-<br>2011.08.31 |      | 10:00 | 2.87 | 27.62 | 5.45                                                                                                                                                                                                            |                                                         |                       |
|                                       |                           |      | 11:00 | 3.82 | 32.62 | 6.59                                                                                                                                                                                                            | HONO: LOPAP;                                            |                       |
|                                       |                           |      | 12:00 | 5.34 | 31.31 | 7.41                                                                                                                                                                                                            | NO <sub>2</sub> : TEI;                                  | Wu et al. (2013)      |
|                                       |                           |      | 13:00 | 4.90 | 27.86 | 7.92                                                                                                                                                                                                            | J(NO <sub>2</sub> ): Optical actinometer.               |                       |
|                                       |                           |      | 14:00 | 4.80 | 24.40 | 7.17                                                                                                                                                                                                            |                                                         |                       |
|                                       |                           |      | 15:00 | 4.12 | 23.33 | 6.02                                                                                                                                                                                                            |                                                         |                       |
| Alaska<br>(71.32 N,<br>156.65 W)      | 2009.03.13-<br>2009.04.14 |      | 10:30 | 0.03 | -     | 4.73                                                                                                                                                                                                            |                                                         |                       |
|                                       |                           |      | 11:00 | 0.03 | -     | 6.03                                                                                                                                                                                                            | HONO: LOPAP;                                            |                       |
|                                       |                           |      | 11:30 | 0.06 | 4.23  | 8.16                                                                                                                                                                                                            | NO <sub>2</sub> : estimated from NO and NO <sub>y</sub> | Villena et al. (2011) |
|                                       |                           |      | 12:00 | 0.09 | -     | 8.81                                                                                                                                                                                                            | (measured by the NO-O <sub>3</sub>                      |                       |
|                                       |                           |      | 12:30 | 0.05 | -     | 9.46                                                                                                                                                                                                            | chemiluminescence detector;                             |                       |
|                                       |                           |      | 13:00 | 0.08 | -     | 8.69                                                                                                                                                                                                            | J(NO <sub>2</sub> ): estimated as a function of solar   |                       |
|                                       |                           |      | 13:30 | 0.07 | 17.31 | 7.63                                                                                                                                                                                                            | zenith angle using the TUV radiative                    |                       |
|                                       |                           |      | 14:00 | 0.05 | 12.24 | 6.33                                                                                                                                                                                                            | transfer model.                                         |                       |
|                                       | 14:30                     | 0.03 | 8.85  | 4.79 |       |                                                                                                                                                                                                                 |                                                         |                       |
| Michigan<br>(45.50 N,<br>84.70 W)     | 2008.07.17-<br>2008.08.07 | noon | 0.35  | 1.00 | 8.48  | HONO: LOPAP;<br>NO <sub>2</sub> : Custom-built analyzer using the<br>chemiluminescence technique;<br>J(NO <sub>2</sub> ): estimated as a function of UV<br>measured by the TUV radiative transfer<br>model/10%. | Zhang et al. (2012)                                     |                       |
| Michigan<br>(45.50 N,<br>84.70 W)     | 2000.07.27                | noon | 1.60  | 0.13 | 8.48  | HONO: Two-channel measurement<br>system (Zhou et al., 1999);<br>NO <sub>2</sub> : TEI Model.                                                                                                                    | Zhou et al. (2002a)                                     |                       |

|                                      |                                           |       |      |       |      |                                                                                                                                                                                            |                             |
|--------------------------------------|-------------------------------------------|-------|------|-------|------|--------------------------------------------------------------------------------------------------------------------------------------------------------------------------------------------|-----------------------------|
| Spain<br>(37.10 °N,<br>6.74 °W)      | 2008.07.17-<br>2008.08.07<br>(cloud-free) | 10:00 | 0.11 | 2.15  | 5.39 | HONO: LOPAP/12%;<br>NO <sub>2</sub> : Droplet Measurement Technologies<br>(Hosaynali-Beygi et al., 2011)/8%;<br>J(NO <sub>2</sub> ): Filter radiometers/5%;<br>P <sub>unknown</sub> : 18%. | Sörgel et al. (2011)        |
|                                      |                                           | 11:00 | 0.10 | 1.38  | 6.26 |                                                                                                                                                                                            |                             |
|                                      |                                           | 12:00 | 0.08 | 0.95  | 6.76 |                                                                                                                                                                                            |                             |
|                                      |                                           | 13:00 | 0.09 | 0.84  | 6.68 |                                                                                                                                                                                            |                             |
|                                      |                                           | 14:00 | 0.08 | 0.79  | 6.03 |                                                                                                                                                                                            |                             |
|                                      |                                           | 15:00 | 0.05 | 0.66  | 4.62 |                                                                                                                                                                                            |                             |
| New York<br>(42.09 °N,<br>77.21 °W)  | 1998.06.26-<br>1998.07.14                 | noon  | 0.22 | 1.00  | 8.48 | HONO: Two-channel measurement<br>system (Zhou et al., 1999);<br>NO <sub>2</sub> : TEI Model.                                                                                               | Zhou et al. (2002b)         |
| Santiago<br>(33.45 °S,<br>70.67 °W)  | 2005.03.08-<br>2005.03.20                 | noon  | 1.70 | 10.00 | 8.00 | HONO: LOPAP;<br>NO <sub>2</sub> : DOAS-OPSS optical system;<br>J(NO <sub>2</sub> ): Filter radiometers.                                                                                    | Elshorbany et al.<br>(2009) |
| Houston<br>(29.76 °N,<br>95.37 °W)   | 2009.04.21                                | 10:00 | 0.40 | 7.50  | 7.29 | HONO: LP-DOAS/5%;<br>NO <sub>2</sub> : LP-DOAS /3%;<br>J(NO <sub>2</sub> ): SAFS;<br>P <sub>unknown</sub> : 10~20%.                                                                        | Wong et al. (2012)          |
|                                      |                                           | 11:00 | 0.59 | 6.02  | 7.77 |                                                                                                                                                                                            |                             |
|                                      |                                           | 12:00 | 0.74 | 5.45  | 8.03 |                                                                                                                                                                                            |                             |
|                                      |                                           | 13:00 | 0.66 | 4.89  | 8.03 |                                                                                                                                                                                            |                             |
|                                      |                                           | 14:00 | 0.51 | 5.45  | 7.76 |                                                                                                                                                                                            |                             |
|                                      |                                           | 15:00 | 0.57 | 5.91  | 7.18 |                                                                                                                                                                                            |                             |
| Colorado<br>(40.05 °N,<br>105.00 °W) | 2011.02.19-<br>2011.02.25                 | 10:00 | 0.05 | 6.04  | 5.84 | HONO: NI-PT-CIMS;<br>NO <sub>2</sub> : a cavity ring-down spectrometer<br>(Wagner et al., 2011)/5%;<br>J(NO <sub>2</sub> ): Filter radiometers.                                            | VandenBoer et al.<br>(2013) |
|                                      |                                           | 11:00 | 0.08 | 5.49  | 6.39 |                                                                                                                                                                                            |                             |
|                                      |                                           | 12:00 | 0.46 | 2.39  | 6.64 |                                                                                                                                                                                            |                             |
|                                      |                                           | 13:00 | 0.37 | 1.55  | 6.39 |                                                                                                                                                                                            |                             |
|                                      |                                           | 14:00 | 0.28 | 1.27  | 6.02 |                                                                                                                                                                                            |                             |
|                                      |                                           | 15:00 | 0.22 | 1.47  | 5.22 |                                                                                                                                                                                            |                             |
| Jülich                               | 2003.07.29                                | noon  | 0.50 | 0.35  | 6.63 | HONO: LOPAP;                                                                                                                                                                               | Kleffmann et al. (2005)     |

|                               |             |       |      |       |      |                                                                                                                                                                                                                             |                       |
|-------------------------------|-------------|-------|------|-------|------|-----------------------------------------------------------------------------------------------------------------------------------------------------------------------------------------------------------------------------|-----------------------|
| (50.92 N,<br>6.36 E)          |             |       |      |       |      | NO <sub>2</sub> : Chemiluminescence analyzer equipped with a photolytic converter for NO <sub>2</sub> to NO conversion;<br>J(NO <sub>2</sub> ): derived from actinic flux spectra measured by a scanning spectroradiometer. |                       |
|                               |             | 10:00 | 0.42 | 3.91  | 6.31 |                                                                                                                                                                                                                             |                       |
|                               |             | 11:00 | 0.38 | 3.42  | 7.76 |                                                                                                                                                                                                                             |                       |
|                               | 2009.07.09- | 12:00 | 0.52 | 3.14  | 8.08 |                                                                                                                                                                                                                             |                       |
|                               | 2009.07.27  | 13:00 | 0.67 | 3.00  | 8.24 | HONO: Wet chemical derivatization (SA/NED), HPLC detection                                                                                                                                                                  |                       |
|                               |             | 14:00 | 0.38 | 3.00  | 7.29 | (NitroMAC)/12%;                                                                                                                                                                                                             |                       |
| Paris<br>(40.72 N,<br>2.21 E) |             | 15:00 | 0.35 | 3.11  | 7.88 |                                                                                                                                                                                                                             | Michoud et al. (2014) |
|                               |             | 10:00 | 0.08 | 10.49 | 1.16 | NO <sub>2</sub> : Luminol chemiluminescence/5%;                                                                                                                                                                             |                       |
|                               |             | 11:00 | 0.11 | 10.49 | 1.80 | J(NO <sub>2</sub> ): filter radiometer/ 20–25%.                                                                                                                                                                             |                       |
|                               | 2010.01.15- | 12:00 | 0.18 | 9.44  | 2.60 |                                                                                                                                                                                                                             |                       |
|                               | 2010.02.15  | 13:00 | 0.21 | 8.76  | 2.20 |                                                                                                                                                                                                                             |                       |
|                               |             | 14:00 | 0.20 | 9.12  | 2.34 |                                                                                                                                                                                                                             |                       |
|                               |             | 15:00 | 0.22 | 9.07  | 1.99 |                                                                                                                                                                                                                             |                       |

- 3 WD/IC: Wet Denuder sampling/Ion Chromatograph analysis system; TUV: Ultraviolet-Visible Model; TEI: Thermo Environmental Instruments; LOPAP: Long path  
4 absorption photometer; LP-DOAS: Long path Differential Optical Absorption Spectroscopy instrument; SAFS: scanning actinic flux spectroradiometer;  
5 NI-PT-CIMS: Negative-Ion Proton-Transfer Mass Spectrometer; SA/NED: an aqueous sulphanilamide/ N-(1-naphthyl)-ethylenediamine solution; NitroMAC: an  
6 instrument developed at the laboratory (Afif et al., 2014); HPLC: High Performance Liquid Chromatography.  
7 Note that: Since J(NO<sub>2</sub>) data of Wu et al. (2013), Zhang et al. (2012), Zhou et al. (2002b), VandenBoer et al. (2013), Kleffmann et al. (2005) were not measured,



8 they were calculated from the J(HONO) measurement data ( $J(\text{NO}_2) = 5.3J(\text{HONO})$ ) (Kraus and Hofzumahaus, 1998);  $J(\text{NO}_2)$  data of Zhou et al. (2002ab) were  
9 derived from the campaign of Zhang et al. (2012) (The experiments were conducted in summer and the studied sites were close to each other).  $J(\text{NO}_2)$  data of  
10 Spataro et al. (2013) were also calculated from the J(HONO) at noon ( $J(\text{NO}_2) = 5.3J(\text{HONO})$ ), then we computed the hourly  $J(\text{NO}_2)$  (8:00~14:00 LST) through  
11 multiplying by the cosine of solar zenith angle. The  $\text{NO}_2$  mixing ratios of Zhang et al. (2012) and Zhou et al. (2002b) were not shown and derived from  $\text{NO}_x$  mixing  
12 ratios. Similarly,  $\text{NO}_2$  mixing ratios of Kleffmann et al. (2005) were inferred from NO mixing ratios.

13

14

15

16

17

18

19

20

21

22

23

24

25

26 Table S2. Daytime (06:00–18:00 LST) average HO<sub>2</sub> budgets in Beijing/Shanghai/Guangzhou in August 2007.

| Reaction                              | Case R                         |                          | Case R <sub>wop</sub>          |                          | Case R <sub>p</sub>            |                          |
|---------------------------------------|--------------------------------|--------------------------|--------------------------------|--------------------------|--------------------------------|--------------------------|
|                                       | Rate<br>(ppb h <sup>-1</sup> ) | Contribution<br>(%)      | Rate<br>(ppb h <sup>-1</sup> ) | Contribution<br>(%)      | Rate<br>(ppb h <sup>-1</sup> ) | Contribution<br>(%)      |
| HO <sub>2</sub> production            |                                |                          |                                |                          |                                |                          |
| <b>OH+CO</b>                          | <b>0.785/0.203/0.576</b>       | <b>33.42/28.27/38.26</b> | <b>0.932/0.227/0.637</b>       | <b>34.63/29.12/38.73</b> | <b>2.573/0.506/1.001</b>       | <b>41.34/32.93/40.82</b> |
| <b>CH<sub>3</sub>O<sub>2</sub>+NO</b> | <b>0.543/0.161/0.328</b>       | <b>23.12/22.53/21.75</b> | <b>0.580/0.170/0.346</b>       | <b>21.56/21.79/21.04</b> | <b>1.165/0.258/0.522</b>       | <b>18.72/16.80/21.29</b> |
| <b>HCHO+hv</b>                        | <b>0.243/0.086/0.112</b>       | <b>10.34/11.97/7.42</b>  | <b>0.262/0.090/0.116</b>       | <b>9.74//11.47/7.06</b>  | <b>0.400/0.102/0.125</b>       | <b>6.43/6.65/5.11</b>    |
| OH+HCHO                               | 0.150/0.050/0.146              | 6.40/7.00/9.71           | 0.166/0.053/0.156              | 6.17/6.75/9.46           | 0.544/0.096/0.242              | 8.73/6.26/9.86           |
| OH+OLET/OLEI                          | 0.192/0.054/0.059              | 8.17/7.47/3.92           | 0.264/0.065/0.077              | 9.83/8.31/4.67           | 0.537/0.206/0.095              | 8.63/13.44/3.88          |
| OH+H <sub>2</sub>                     | 0.038/0.021/0.050              | 1.62/2.91/3.29           | 0.040/0.022/0.052              | 1.49/2.76/3.17           | 0.095/0.027/0.075              | 1.53/1.74/3.06           |
| OH+SO <sub>2</sub>                    | 0.054/0.030/0.035              | 2.30/4.20/2.33           | 0.064/0.034/0.041              | 2.37/4.34/2.48           | 0.172/0.116/0.072              | 2.77/7.53/2.95           |
| OH+O <sub>3</sub>                     | 0.028/0.006/0.035              | 1.18/0.88/2.31           | 0.029/0.006/0.036              | 1.08/0.82/2.20           | 0.072/0.005/0.046              | 1.15/0.30/1.88           |
| OH+XYL                                | 0.052/0.022/0.023              | 2.21/3.10/1.50           | 0.066/0.026/0.029              | 2.46/3.34/1.75           | 0.141/0.078/0.045              | 2.27/5.11/1.84           |
| OH+H <sub>2</sub> O <sub>2</sub>      | 0.015/0.008/0.027              | 0.63/1.14/1.77           | 0.016/0.008/0.029              | 0.59/1.08/1.78           | 0.040/0.010/0.043              | 0.65/0.66/1.74           |
| OH+TOL                                | 0.027/0.007/0.011              | 1.16/0.94/0.76           | 0.034/0.008/0.014              | 1.27/1.02/0.86           | 0.086/0.025/0.024              | 1.38/1.60/0.97           |
| ALD2/MGLY<br>/ANOE+hv                 | 0.046/0.012/0.012              | 1.95/1.69/0.80           | 0.051/0.013/0.013              | 1.91/1.66/0.82           | 0.074//0.014/0.013             | 1.19/0.93/0.51           |
| OH+ETH/OPEN                           | 0.007/0.002/0.004              | 0.28/0.31/0.29           | 0.008/0.002/0.005              | 0.30/0.32/0.30           | 0.036/0.009/0.011              | 0.30/0.56/0.44           |
| O <sub>3</sub> +OLET/OLEI             | 0.036/0.009/0.009              | 1.55/1.21/0.59           | 0.035/0.009/0.009              | 1.28/1.11/0.52           | 0.030/0.008/0.009              | 0.48/0.50/0.38           |
| RO <sub>2</sub> +NO                   | 0.017/0.004/0.007              | 0.69/0.62/0.44           | 0.017/0.005/0.007              | 0.64/0.62/0.42           | 0.024/0.005/0.009              | 0.38/0.34/0.37           |
| others+hv                             | 0.020/0.007/0.007              | 0.86/0.94/0.47           | 0.025/0.008/0.008              | 0.92/0.96/0.50           | 0.046/0.010/0.008              | 0.74/0.63/0.33           |
| NO+ETHP                               | 0.013/0.003/0.005              | 0.54/0.44/0.31           | 0.013/0.003/0.005              | 0.47/0.42/0.30           | 0.019/0.004/0.007              | 0.30/0.26/0.28           |
| NO+ISOPP                              | 0.030/0.005/0.003              | 1.26/0.70/0.20           | 0.031/0.005/0.004              | 1.15/0.66/0.24           | 0.038/0.007/0.004              | 0.61/0.43/0.17           |
| OH+CH <sub>3</sub> OH                 | 0.002/0.001/0.002              | 0.09/0.09/0.11           | 0.002/0.001/0.002              | 0.09/0.09/0.11           | 0.007/0.002/0.003              | 0.11/0.11/0.12           |

/ANOL/CRES

|                         |                      |                   |                      |                   |                      |                   |
|-------------------------|----------------------|-------------------|----------------------|-------------------|----------------------|-------------------|
| HNO <sub>4</sub> +hv    | 0.004/0.001/0.002    | 0.19/0.09/0.14    | 0.004/0.001/0.002    | 0.17/0.09/0.13    | 0.007/0.001/0.003    | 0.11/0.06/0.11    |
| CH <sub>3</sub> OOH/ET  | 0.002/0.012/0.002    | 0.09/0.39/0.13    | 0.002/0.003/0.002    | 0.08/0.37/0.12    | 0.002/0.003/0.002    | 0.12/0.18/0.06    |
| HOOH+hv                 |                      |                   |                      |                   |                      |                   |
| O <sub>3</sub> +ETH     | 0.003/<0.001/0.001   | 0.12/0.06/0.03    | 0.003/<0.001/0.001   | 0.10/0.05/0.03    | 0.003/<0.001/0.001   | 0.04/0.02/0.02    |
| O <sub>3</sub> +ISOP    | <0.001/<0.001/<0.001 | <0.01/<0.01/<0.01 | <0.001/<0.001/<0.001 | <0.01/<0.01/<0.01 | <0.001/<0.001/<0.001 | <0.01/<0.01/<0.01 |
| O <sub>3</sub> +others  | 0.001/<0.001/<0.001  | 0.03/0.02/0.02    | 0.001/<0.001/<0.001  | 0.03/0.02/0.02    | 0.001/<0.001/<0.001  | 0.02/0.01/0.01    |
| NO <sub>3</sub> +HCHO   | <0.001/<0.001/<0.001 | <0.01/<0.01/<0.01 | <0.001/<0.001/<0.001 | <0.01/<0.01/<0.01 | <0.001/<0.001/<0.001 | <0.01/<0.01/<0.01 |
| NO <sub>3</sub> +others | <0.001/<0.001/<0.001 | <0.01/<0.01/<0.01 | <0.001/<0.001/<0.001 | <0.01/<0.01/<0.01 | <0.001/0.001/<0.001  | <0.01/<0.01/<0.01 |
| HNO <sub>4</sub> dec    | <0.001/<0.001/<0.001 | <0.01/<0.01/<0.01 | <0.001/<0.001/0.001  | <0.01/<0.01/<0.01 | <0.001/<0.001/<0.001 | <0.01/<0.01/<0.01 |
| Total                   | 2.349/0.716/1.506    | 100/100/100       | 2.691/0.780/1.644    | 100/100/100       | 6.223/1.536/2.451    | 100/100/100       |

HO<sub>2</sub> loss

|                                                 |                          |                          |                          |                          |                          |                          |
|-------------------------------------------------|--------------------------|--------------------------|--------------------------|--------------------------|--------------------------|--------------------------|
| <b>HO<sub>2</sub>+NO</b>                        | <b>2.778/0.732/1.748</b> | <b>99.34/99.61/98.29</b> | <b>2.829/0.793/1.608</b> | <b>99.38/99.63/98.37</b> | <b>7.101/1.402/2.552</b> | <b>99.15/99.55/98.04</b> |
| HO <sub>2</sub> +O <sub>3</sub>                 | 0.009/0.001/0.014        | 0.30/0.08/0.70           | 0.008/0.001/0.011        | 0.28/0.08/0.67           | 0.026/0.001/0.019        | 0.36/0.08/0.74           |
| HO <sub>2</sub> +NO <sub>2</sub>                | 0.007/0.002/0.009        | 0.28/0.29/0.60           | 0.007/0.002/0.010        | 0.25/0.27/0.58           | 0.023/0.005/0.019        | 0.32/0.33/0.72           |
| HO <sub>2</sub> +OH                             | 0.001/<0.001/0.004       | 0.06/0.02/0.30           | 0.002/<0.001/0.005       | 0.06/0.02/0.28           | 0.008/<0.001/0.010       | 0.11/0.03/0.37           |
| HO <sub>2</sub> +HO <sub>2</sub>                | <0.001/<0.001/<0.001     | <0.01/<0.01/0.02         | <0.001/<0.001/<0.001     | <0.01/<0.01/0.01         | <0.001/<0.001/0.001      | <0.01/<0.01/0.03         |
| HO <sub>2</sub> +CH <sub>3</sub> O <sub>2</sub> | <0.001/<0.001/<0.001     | 0.01/<0.01/0.03          | <0.001/<0.001/0.001      | <0.01/<0.01/0.03         | 0.001/<0.001/0.001       | 0.01/<0.01/0.04          |
| HO <sub>2</sub> +C <sub>2</sub> O <sub>3</sub>  | <0.001/<0.001/<0.001     | <0.01/<0.01/0.01         | <0.001/<0.001/<0.001     | <0.01/<0.01/0.01         | <0.001/<0.001/<0.001     | <0.01/<0.01/0.01         |
| HO <sub>2</sub> +RO <sub>2</sub>                | <0.001/<0.001/<0.001     | <0.01/<0.01/<0.01        | <0.001/<0.001/<0.001     | <0.01/<0.01/<0.01        | <0.001/<0.001/<0.001     | <0.01/<0.01/<0.01        |
| HO <sub>2</sub> +XO <sub>2</sub>                | <0.001/<0.001/<0.001     | 0.02/<0.01/0.04          | <0.001/<0.001/0.001      | 0.01/<0.01/0.04          | 0.002/<0.001/0.001       | 0.03/<0.01/0.05          |
| HO <sub>2</sub> +otherRO <sub>2</sub>           | <0.001/<0.001/<0.001     | <0.01/<0.01/0.01         | <0.001/<0.001/<0.001     | <0.01/<0.01/0.01         | <0.001/<0.001/<0.001     | <0.01/<0.01/0.01         |
| HO <sub>2</sub> +NO <sub>3</sub>                | <0.001/<0.001/<0.001     | <0.01/<0.01/<0.01        | <0.001/<0.001/<0.001     | <0.01/<0.01/<0.01        | <0.001/<0.001/<0.001     | <0.01/<0.01/<0.01        |
| Total                                           | 2.798/0.737/1.775        | 100/100/100              | 2.846/0.795/1.635        | 100/100/100              | 7.161/1.408/2.604        | 100/100/100              |

27 ETHP: ethylperoxy; ISOPP: lumped peroxyradical of isoprene.

28

29 Table S3. Daytime (06:00–18:00 LST) average RO<sub>2</sub> budgets in Beijing/Shanghai/Guangzhou in August 2007.

| Reaction                                                   | Case R                         |                          | Case R <sub>wop</sub>          |                          | Case R <sub>p</sub>            |                          |
|------------------------------------------------------------|--------------------------------|--------------------------|--------------------------------|--------------------------|--------------------------------|--------------------------|
|                                                            | Rate<br>(ppb h <sup>-1</sup> ) | Contribution<br>(%)      | Rate<br>(ppb h <sup>-1</sup> ) | Contribution<br>(%)      | Rate<br>(ppb h <sup>-1</sup> ) | Contribution<br>(%)      |
| RO <sub>2</sub> production                                 |                                |                          |                                |                          |                                |                          |
| <b>OH+OLET/OLEI</b>                                        | <b>0.192/0.054/0.060</b>       | <b>22.45/21.07/14.88</b> | <b>0.264/0.065/0.077</b>       | <b>25.81/22.92/17.10</b> | <b>0.537/0.110/0.114</b>       | <b>25.62/22.20/16.73</b> |
| <b>OH+ETH</b>                                              | <b>0.157/0.030/0.041</b>       | <b>18.36/11.91/10.24</b> | <b>0.197/0.036/0.049</b>       | <b>19.26/12.61/11.00</b> | <b>0.484/0.068/0.080</b>       | <b>21.98/13.73/11.78</b> |
| <b>OH+CH<sub>4</sub></b>                                   | <b>0.103/0.057/0.135</b>       | <b>12.09/22.44/33.97</b> | <b>0.109/0.059/0.142</b>       | <b>10.65/20.81/31.55</b> | <b>0.260/0.115/0.223</b>       | <b>11.46/23.33/32.73</b> |
| <b>OH+AONE</b>                                             | <b>0.092/0.018/0.045</b>       | <b>10.76/7.09/11.24</b>  | <b>0.109/0.020/0.049</b>       | <b>10.65/6.99/10.87</b>  | <b>0.323/0.047/0.081</b>       | <b>13.65/9.55/11.95</b>  |
| OH+XYL                                                     | 0.052/0.022/0.023              | 6.06/8.74/5.69           | 0.066/0.026/0.029              | 6.45/9.21/6.42           | 0.141/0.046/0.044              | <b>6.63/9.32/6.52</b>    |
| AONE/ETH+hv(C <sub>2</sub> O <sub>3</sub> )                | 0.037/0.011/0.011              | 4.37/4.24/2.71           | 0.042/0.012/0.012              | 4.07/4.10/2.67           | 0.062/0.013/0.012              | 2.83/2.68/1.74           |
| O <sub>3</sub> +OLET/OLEI(C <sub>2</sub> O <sub>3</sub> )  | 0.031/0.007/0.008              | 3.63/2.90/1.89           | 0.029/0.007/0.007              | 2.87/2.61/1.62           | 0.025/0.007/0.008              | 1.33/1.32/1.15           |
| others+hv(C <sub>2</sub> O <sub>3</sub> )                  | 0.020/0.007/0.007              | 2.29/2.58/1.67           | 0.024/0.007/0.008              | 2.35/2.59/1.75           | 0.045/0.010/0.008              | 1.98/1.92/1.11           |
| O <sub>3</sub> +OLET/OLEI(otherR<br>O <sub>2</sub> )       | 0.018/0.004/0.004              | 2.05/1.66/1.07           | 0.017/0.004/0.004              | 1.63/1.49/0.91           | 0.014/0.004/0.004              | 0.75/0.76/0.65           |
| OH+TOL                                                     | 0.027/0.007/0.011              | 3.20/2.66/2.89           | 0.034/0.008/0.014              | 3.32/2.80/3.13           | 0.086/0.015/0.023              | 3.88/3.13/3.45           |
| OH+ISOP                                                    | 0.019/0.004/0.002              | 2.21/1.64/0.49           | 0.020/0.004/0.003              | 1.96/1.54/0.60           | 0.017/0.007/0.003              | 0.91/1.35/0.46           |
| O <sub>3</sub> +OLET/OLEI(XO <sub>2</sub> )                | 0.015/0.003/0.004              | 1.70/1.36/0.89           | 0.014/0.003/0.003              | 1.35/1.22/0.76           | 0.012/0.003/0.004              | 0.62/0.62/0.54           |
| AONE/ETH+hv(CH <sub>3</sub> O <sub>2</sub> )               | 0.014/0.003/0.004              | 1.68/1.10/0.92           | 0.016/0.003/0.004              | 1.54/1.00/0.83           | 0.019/0.002/0.003              | 0.87/0.49/0.49           |
| O <sub>3</sub> +OLET/OLEI(CH <sub>3</sub> O <sub>2</sub> ) | 0.016/0.004/0.004              | 1.91/1.52/0.99           | 0.015/0.004/0.004              | 1.51/1.37/0.86           | 0.013/0.003/0.004              | 0.70/0.70/0.61           |
| OH+PEROXID                                                 | 0.010/0.011/0.014              | 1.18/4.37/3.40           | 0.011/0.004/0.014              | 1.08/4.13/3.23           | 0.022/0.020/0.022              | 1.02/4.04/3.28           |
| OH+C <sub>2</sub> H <sub>6</sub>                           | 0.005/0.002/0.004              | 0.57/0.87/1.03           | 0.007/0.003/0.005              | 0.68/0.93/1.03           | 0.015/0.005/0.007              | 0.70/1.03/0.97           |
| NO <sub>3</sub> +OLET/OLEI<br>(otherRO <sub>2</sub> )      | 0.005/0.001/0.002              | 0.53/0.41/0.56           | 0.005/0.001/0.002              | 0.45/0.39/0.51           | 0.005/0.001/0.003              | 0.24/0.19/0.41           |
| O <sub>3</sub> +OLET/OLEI (ETHP)                           | 0.008/0.002/0.002              | 0.97/0.77/0.51           | 0.008/0.002/0.002              | 0.77/0.70/0.43           | 0.007/0.002/0.002              | 0.35/0.35/0.31           |

|                                                           |                      |                   |                      |                   |                      |                   |
|-----------------------------------------------------------|----------------------|-------------------|----------------------|-------------------|----------------------|-------------------|
| OH+C <sub>2</sub> H <sub>6</sub>                          | 0.002/0.001/0.002    | 0.29/0.27/0.48    | 0.003/0.001/0.002    | 0.29/0.27/0.48    | 0.008/0.002/0.004    | 0.35/0.33/0.54    |
| OH+CH <sub>3</sub> OH/AN<br>OL/CRES                       | 0.002/0.001/0.001    | 0.20/0.20/0.23    | 0.002/0.001/0.001    | 0.20/0.20/0.23    | 0.007/0.001/0.002    | 0.31/0.30/0.30    |
| O <sub>3</sub> +others(C <sub>2</sub> O <sub>3</sub> )    | 0.001/<0.001/<0.001  | 0.07/0.05/0.05    | 0.001/<0.001/<0.001  | 0.06/0.04/0.04    | 0.001/<0.001/<0.001  | 0.04/0.03/0.04    |
| others+hv(XO <sub>2</sub> )                               | <0.001/<0.001/<0.001 | 0.05/0.04/0.05    | <0.001/<0.001/<0.001 | 0.04/0.03/0.04    | <0.001/<0.001/<0.001 | 0.02/0.01/0.03    |
| H <sub>2</sub> O <sub>2</sub> +hv(XO <sub>2</sub> )       | <0.001/<0.001/<0.001 | 0.02/0.01/0.01    | <0.001/<0.001/<0.001 | 0.02/0.01/0.01    | <0.001/<0.001/<0.001 | <0.01/<0.01/0.01  |
| O <sub>3</sub> +ISOP(C <sub>2</sub> O <sub>3</sub> )      | <0.001/<0.001/<0.001 | 0.02/0.01/<0.01   | <0.001/<0.001/<0.001 | 0.01/0.01/<0.01   | <0.001/<0.001/<0.001 | <0.01/<0.01/<0.01 |
| others+hv(CH <sub>3</sub> O <sub>2</sub> )                | <0.001/<0.001/<0.001 | 0.03/0.01/<0.01   | <0.001/<0.001/<0.001 | 0.02/<0.01/<0.01  | <0.001/<0.001/<0.001 | <0.01/<0.01/<0.01 |
| O <sub>3</sub> +others(CH <sub>3</sub> O <sub>2</sub> )   | <0.001/<0.001/<0.001 | 0.01/<0.01/<0.01  | <0.001/<0.001/<0.001 | <0.01/<0.01/<0.01 | <0.001/<0.001/<0.001 | <0.01/<0.01/<0.01 |
| H <sub>2</sub> O <sub>2</sub> +hv (ETHP)                  | <0.001/<0.001/<0.001 | <0.01/<0.01/<0.01 | <0.001/<0.001/<0.001 | <0.01/<0.01/<0.01 | <0.001/<0.001/<0.001 | <0.01/<0.01/<0.01 |
| others+hv (ETHP)                                          | <0.001/<0.001/<0.001 | 0.01/<0.01/0.01   | <0.001/<0.001/<0.001 | <0.01/<0.01/0.01  | <0.001/<0.001/<0.001 | <0.01/<0.01/0.01  |
| NO <sub>3</sub> +AONE/ETH(C <sub>2</sub> O <sub>3</sub> ) | <0.001/<0.001/<0.001 | <0.01/<0.01/<0.01 | <0.001/<0.001/<0.001 | <0.01/<0.01/<0.01 | <0.001/<0.001/<0.001 | <0.01/<0.01/<0.01 |
| NO <sub>3</sub> +others(C <sub>2</sub> O <sub>3</sub> )   | <0.001/<0.001/<0.001 | <0.01/<0.01/<0.01 | <0.001/<0.001/<0.001 | <0.01/<0.01/<0.01 | <0.001/<0.001/<0.001 | <0.01/<0.01/<0.01 |
| O <sub>3</sub> +others(XO <sub>2</sub> )                  | <0.001/<0.001/<0.001 | 0.01/<0.01/<0.01  | <0.001/<0.001/<0.001 | 0.01/<0.01/<0.01  | <0.001/<0.001/<0.001 | <0.01/<0.01/<0.01 |
| O <sub>3</sub> +ISOP(XO <sub>2</sub> )                    | <0.001/<0.001/<0.001 | 0.02/0.01/<0.01   | <0.001/<0.001/<0.001 | 0.01/0.01/<0.01   | <0.001/<0.001/<0.001 | <0.01/<0.01/<0.01 |
| OH+others                                                 | 0.028/0.005/0.016    | 3.22/2.06/4.13    | 0.030/0.006/0.018    | 2.93/1.98/3.91    | 0.077/0.014/0.029    | 3.34/2.61/4.20    |
| Total                                                     | 0.854/0.254/0.397    | 100/100/100       | 0.852/0.283/0.449    | 100/100/100       | 2.183/0.494/0.680    | 100/100/100       |

RO<sub>2</sub> loss

|                                       |                          |                          |                          |                          |                          |                          |
|---------------------------------------|--------------------------|--------------------------|--------------------------|--------------------------|--------------------------|--------------------------|
| <b>CH<sub>3</sub>O<sub>2</sub>+NO</b> | <b>0.543/0.161/0.328</b> | <b>94.56/95.28/96.07</b> | <b>0.580/0.170/0.346</b> | <b>94.68/95.24/96.06</b> | <b>1.165/0.258/0.522</b> | <b>95.76/96.27/96.30</b> |
| RO <sub>2</sub> +NO                   | 0.016/0.004/0.007        | 2.81/2.64/1.93           | 0.017/0.005/0.007        | 2.80/2.69/1.93           | 0.024/0.005/0.009        | <b>1.96/1.94/1.68</b>    |
| NO+ETHP                               | 0.013/0.003/0.005        | 2.19/1.86/1.36           | 0.013/0.003/0.005        | 2.07/1.84/1.36           | 0.019/0.004/0.007        | <b>1.54/1.48/1.25</b>    |
| otherRO2 term                         | 0.002/<0.001/0.001       | 0.32/0.22/0.27           | 0.002/<0.001/0.001       | 0.32/0.22/0.28           | 0.005/0.001/0.002        | 0.43/0.29/0.28           |
| CH <sub>3</sub> O <sub>2</sub> term   | <0.001/<0.001/0.001      | 0.04/<0.01/0.15          | <0.001/<0.001/0.001      | 0.04/<0.01/0.15          | 0.001/<0.001/0.001       | 0.08/<0.01/0.20          |
| HO <sub>2</sub> +RO <sub>2</sub>      | <0.001/<0.001/<0.001     | <0.01/<0.01/<0.01        | <0.001/<0.001/<0.001     | <0.01/<0.01/<0.01        | <0.001/<0.001/<0.001     | 0.01/<0.01/0.01          |
| XO <sub>2</sub> term                  | <0.001/<0.001/<0.001     | 0.07/<0.01/0.02          | <0.001/<0.001/0.001      | 0.07/<0.01/0.19          | 0.002/<0.001/0.001       | 0.18/0.02/0.26           |
| C <sub>2</sub> O <sub>3</sub> term    | <0.001/<0.001/<0.001     | 0.01/<0.01/0.01          | <0.001/<0.001/<0.001     | <0.01/<0.01/0.02         | 0.001/<0.001/<0.001      | 0.05/0.01/0.03           |

| ETHP term | <0.001/<0.001/0.001 | <0.01/<0.01/0.19 | <0.001/<0.001/<0.001 | <0.01/<0.01/0.01 | <0.001/<0.001/<0.001 | <0.01/<0.01/<0.01 |
|-----------|---------------------|------------------|----------------------|------------------|----------------------|-------------------|
| Total     | 0.574/0.169/0.341   | 100/100/100      | 0.613/0.179/0.360    | 100/100/100      | 1.216/0.268/0.542    | 100/100/100       |

---

30 Species in braces for reactions mean main products.

- 31
- 32
- 33
- 34
- 35
- 36
- 37
- 38
- 39
- 40
- 41
- 42
- 43
- 44
- 45
- 46
- 47
- 48
- 49
- 50
- 51
- 52

53 **Reference**

54

55 Afif, C., Jambert, C., Colomb, A., Eyglunent, G., Borbon, A., Dađe, V., Doussin, J.  
56 F., and Perros, P. E.: NitroMAC: an instrument for the measurement of HONO.  
57 Intercomparison with LOPAP, *Water Air Soil Poll.*, in preparation, 2014.

58

59 Elshorbany, Y. F., Kurtenbach, R., Wiesen, P., Lissi, E., Rubio, M., Villena, G.,  
60 Gramsch, E., Rickard, A. R., Pilling, M. J., Kleffmann, J.: Oxidation capacity of  
61 the city air of Santiago, Chile. *Atmospheric Chemistry and Physics*, 9(6),  
62 2257-2273, 2009.

63

64 Hosaynali Beygi, Z., Fischer, H., Harder, H. D., Martinez, M., Sander, R., Williams,  
65 J., Brookes, D. M., Monks, P. S., and Lelieveld, J.: Oxidation photochemistry in  
66 the Southern Atlantic boundary layer: unexpected deviations of photochemical  
67 steady state, *Atmos. Chem. Phys.*, 11, 8497–8513, doi:10.5194/acp-11-  
68 8497-2011, 2011.

69

70 Kleffmann, J., Gavrioloaiei, T., Hofzumahaus, A., Holland, F., Koppmann, R., Rupp,  
71 L., Schlosser, E., Siese, M., and Wahner, A.: Daytime formation of nitrous acid: a  
72 major source of OH radicals in a forest, *J. Geophys. Res. Lett.*, 32(5), doi:  
73 10.1029/2005GL022524, 2005.

74

75 Kondo, Y., S. Kawakami, M. Koike, D. Fahey, H. Nakajima, Y. Zhao, N. Toriyama,  
76 M. Kanada, G. Sachse, and G. Gregory.: The performance of an aircraft  
77 instrument for the measurement of NO<sub>y</sub>. *J. Geophys. Res.*, 102, 28,663–28,671,  
78 1997.

79

80 Michoud, V., Colomb, A., Borbon, A., Miet, K., Beekmann, M., Camredon, M.,  
81 Aumont, B., Perrier, S., Zapf, P., Siour, G., Ait-Helal, W., Afif, C., Kukui, A.,  
82 Furger, M., Dupont, J. C., Haeffelin, M., Doussin, J. F.: Study of the unknown  
83 HONO daytime source at a European suburban site during the MEGAPOLI  
84 summer and winter field campaigns. *Atmospheric Chemistry and Physics*, 14(6),  
85 2805-2822, 2014.

86

87 Sörgel, M., Regelin, E., Bozem, H., Diesch, J. M., Drewnick, F., Fischer, H., Harder,  
88 H., Held, A., Hosaynali-Beygi, Z., Martinez, M., Zetzsch, C.: Quantification of  
89 the unknown HONO daytime source and its relation to NO<sub>2</sub>, *Atmospheric  
90 Chemistry and Physics*, 11(20), 10433-10447, 2011.

91

92 Spataro, F., Ianniello, A., Esposito, G., Allegrini, I., Zhu, T., Hu, M.: Occurrence of  
93 atmospheric nitrous acid in the urban area of Beijing (China), *Science of the  
94 Total Environment*, 447, 210-224, 2013.

95

- 96 Su, H., Cheng, Y., Oswald, R., Behrendt, T., Trebs, I., Meixner, F. X., Andreae, M.  
97 O., Cheng, P., Zhang, Y., Pöschl, U.: Soil nitrite as a source of atmospheric  
98 HONO and OH radicals, *Science*, 333(6049), 1616-1618, 2011.  
99
- 100 Su, H., Cheng, Y. F., Shao, M., Gao, D. F., Yu, Z. Y., Zeng, L. M., Slanina, J., Zhang,  
101 Y. H., Wiedensohler, A.: Nitrous acid (HONO) and its daytime sources at a rural  
102 site during the 2004 PRIDE - PRD experiment in China, *Journal of Geophysical*  
103 *Research: Atmospheres* (1984–2012), 113(D14), 2008.  
104
- 105 VandenBoer, T. C., Brown, S. S., Murphy, J. G., Keene, W. C., Young, C. J., Pszenny,  
106 A. A. P., Kim, S., Warneke, C., de Gouw, J. A., Maben, J. R., Wagner, N. L.,  
107 Riedel, T. P., Thornton, J. A., Wolfe, D. E., Dubé W. P., Öztürk, F., Brock, C.  
108 A., Grossberg, N., Lefter, B., Lerner, B. Middlebrook, A. M., Roberts, J. M.:  
109 Understanding the role of the ground surface in HONO vertical structure: High  
110 resolution vertical profiles during NACHTT-11. *Journal of Geophysical*  
111 *Research: Atmospheres*, 118, 10,155–10,171, doi:10.1002/jgrd.50721, 2013.  
112
- 113 Villena, G., Wiesen, P., Cantrell, C. A., Flocke, F., Fried, A., Hall, S. R., Hornbrook, R.  
114 S., Knapp, D., Kosciuch, E., Mauldin, R. L., McGrath, J. A., Montzka, D.,  
115 Richter, D., Ullmann, K., Walega, J., Weibring, P., Weinheimer, A., Staebler, R.  
116 M., Liao, J., Huey, L. G., and Kleffmann, J.: Nitrous acid (HONO) during polar  
117 spring in Barrow, Alaska: a net source of OH radicals?, *J. Geophys. Res.*  
118 *–Atmos.*, 116(D14), doi: 10.1029/2011JD016643, 2011.  
119
- 120 Wagner, N. L., Dubé W. P., Washenfelder, R. A., Young, C. J., Pollack, I. B.,  
121 Ryerson, T. B., Brown S. S.: Diode laser-based cavity ring-down instrument for  
122 NO<sub>3</sub>, N<sub>2</sub>O<sub>5</sub>, NO, NO<sub>2</sub> and O<sub>3</sub> from aircraft, *Atmos. Meas. Technol.*, 4,  
123 1227–1240, 2011.  
124
- 125 Wong, K. W., Tsai, C., Lefter, B., Haman, C., Grossberg, N., Brune, W. H., Ren,  
126 X., Luke, W., Stutz, J.: Daytime HONO vertical gradients during SHARP 2009  
127 in Houston, TX, *Atmospheric Chemistry and Physics*, 12(2), 635-652, 2012.  
128
- 129 Wu, J., Xu, Z., Xue, L., and Wang, T.: Daytime nitrous acid at a polluted suburban  
130 site in Hong Kong: indication of heterogeneous production on aerosol, in:  
131 *Proceedings of 12th international conference on atmospheric sciences and*  
132 *applications to air quality*, Seoul, Korea, 3–5 June 2013, 52, 2013.  
133
- 134 Zhang, N., Zhou, X., Bertman, S., Tang, D., Alaghmand, M., Shepson, P. B., Carroll,  
135 M. A.: Measurements of ambient HONO concentrations and vertical HONO flux  
136 above a northern Michigan forest canopy. *Atmospheric Chemistry and Physics*,  
137 12(17), 8285-8296, 2012.  
138
- 139 Zhou, X., Qiao, H., Deng, G., Civerolo, K.: A method for the measurement of



140 atmospheric HONO based on DNPH derivatization and HPLC analysis. Environ.  
141 Sci. Technol., 33, 3672–3679, 1999  
142  
143 Zhou, X., Civerolo, K., Dai, H., Huang, G., Schwab, J., Demerjian, K. Summertime  
144 nitrous acid chemistry in the atmospheric boundary layer at a rural site in New  
145 York State, Journal of Geophysical Research: Atmospheres (1984–2012),  
146 107(D21), ACH-13, 2002a.  
147  
148 Zhou, X., He, Y., Huang, G., Thornberry, T. D., Carroll, M. A., and Bertman, S. B.:  
149 Photochemical production of nitrous acid on glass sample manifold surface,  
150 Geophys. Res. Lett., 29, 26-1 – 26-4, doi: 10.1029/2002GL015080, 2002b.  
151  
152
